# Supplementary material for: Viral Nucleases from Herpesviruses and Coronavirus in Recombination and Proofreading: Potential Targets for Antiviral Drug Discovery
Source: MDPI journal article supplement (doi:10.3390/v14071557), 2022-07-16
Supplement: s1 [file s1]

## Supplementary Materials

### Viral Nucleases from Herpesviruses and Coronavirus in Recombination and Proofreading; Potential Targets for Antiviral Drug Discovery

Lee R. Wright, Dennis L. Wright and Sandra K. Weller

**Table S1.** Therapeutic agents used to treat HHV and HCoV infections

| Drug Name                                                                                                  | Approval | Indication                                            | Compound Class                           | Target                  |
|------------------------------------------------------------------------------------------------------------|----------|-------------------------------------------------------|------------------------------------------|-------------------------|
| 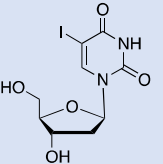<br><b>Idoxuridine</b>    | 1962     | HSV keratitis                                         | nucleoside<br>(deoxyuridine analog)      | viral DNA<br>polymerase |
| <br><b>Cytarabine</b>   | 1969     | HSV (primarily<br>used as an<br>oncological<br>agent) | nucleoside<br>(cytosine analog)          | viral DNA<br>polymerase |
| <br><b>Vidarabine</b>   | 1976     | HSV, VZV<br>(topical)                                 | nucleoside<br>(adenosine analog)         | viral DNA<br>polymerase |
| <br><b>Trifluridine</b> | 1980     | HSV keratitis                                         | nucleoside<br>(deoxythymidine<br>analog) | viral DNA<br>polymerase |
| <br><b>Acyclovir</b>    | 1982     | HSV, VZV                                              | nucleoside<br>(guanosine analog)         | viral DNA<br>polymerase |

|                                                                                                              |      |                              |                                        |                         |
|--------------------------------------------------------------------------------------------------------------|------|------------------------------|----------------------------------------|-------------------------|
| 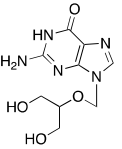<br><b>Ganciclovir</b>      | 1988 | CMV, HSV<br>keratitis        | nucleoside (guanosine<br>analog)       | viral DNA<br>polymerase |
| <br><b>Foscarnet</b>        | 1991 | HSV, CMV                     | Phosphonate<br>(pyrophosphate mimic)   | viral DNA<br>polymerase |
| <br><b>Famciclovir</b>      | 1994 | Herpes zoster                | penciclovir diacetate<br>ester prodrug | viral DNA<br>polymerase |
| <br><b>Valaciclovir</b>     | 1995 | HSV (general)                | acyclovir valine ester<br>prodrug      | viral DNA<br>polymerase |
| <br><b>Cidofovir</b>      | 1996 | CMV retinitis                | nucleotide<br>(cytidine analog)        | viral DNA<br>polymerase |
| <br><b>Penciclovir</b>    | 1996 | Herpes labialis<br>(topical) | nucleoside<br>(guanosine analog)       | viral DNA<br>polymerase |
| <br><b>Valganciclovir</b> | 2001 | CMV                          | ganciclovir valine ester<br>prodrug    | viral DNA<br>polymerase |
| <br><b>Letermovir</b>     | 2017 | CMV                          | allosteric inhibitor                   | CMV terminase           |

|                                                                                                            |                                              |                  |                                      |                              |
|------------------------------------------------------------------------------------------------------------|----------------------------------------------|------------------|--------------------------------------|------------------------------|
| 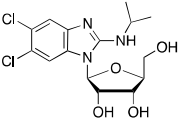<br><b>Maribavir</b>      | 2021                                         | CMV (refractory) | kinase inhibitor                     | CMV pUL97                    |
| <br><b>Brivudine</b>      | Europe only                                  | Herpes zoster    | nucleoside (deoxythymidine analog)   | viral DNA polymerase         |
| <br><b>Brincidofovir</b>  | Investigational (approved 2021 for smallpox) | broad HHV        | cidofovir lipid conjugated prodrug   | viral DNA polymerase         |
| <br><b>Pritelivir</b>    | Investigational                              | HSV              | allosteric inhibitor                 | HSV helicase-primase complex |
| <br><b>Remdesivir</b>   | 2020                                         | SARS-CoV-2       | nucleotide prodrug                   | RNA-dependent RNA-polymerase |
| <br><b>Molnupiravir</b> | EUA (2021)                                   | SARS-CoV-2       | nucleoside prodrug (cytidine analog) | RNA-dependent RNA-polymerase |
| <br><b>Nirmatrelvir</b> | EUA (2021, in combination with ritonavir)    | SARS-CoV-2       | protease inhibitor                   | Viral C3-like-protease       |
